# Supplementary material for: CLIM4OMICS: a geospatially comprehensive climate and multi-OMICS database for Maize phenotype predictability in the U.S. and Canada
Source: Copernicus journal article supplement (doi:10.5194/essd-2023-11), 2023-02-01
Supplement: Supplementary file [file essd-2023-11-AC3-supplement.pdf]

# CLIM4OMICS: a geospatially comprehensive climate and multi-OMICS database for Maize phenotype predictability in the U.S. and Canada

Parisa Sarzaeim<sup>1</sup>, Francisco Muñoz-Arriola<sup>1,2</sup>, Diego Jarquin<sup>3</sup>, Hasnat Aslam<sup>4</sup>, Natalia De Leon Gatti<sup>5</sup>

5 <sup>1</sup>Department of Biological Systems Engineering, University of Nebraska-Lincoln, Lincoln, NE, 68583-0726 USA, Email: parisa.sarzaeim@huskers.unl.edu

<sup>2</sup>School of Natural Resources, University of Nebraska-Lincoln, Lincoln, NE, 68583-0996 USA, Email: fmunoz@unl.edu

<sup>3</sup>Agronomy Department, University of Florida, Gainesville, FL, 32611 USA, Email: jhernandezjarqui@ufl.edu

10 <sup>4</sup>School of Natural Resources, University of Nebraska-Lincoln, Lincoln, NE, 68583-0996 USA, Email: haslam2@huskers.unl.edu

<sup>5</sup>Department of Agronomy, University of Wisconsin-Madison, Madison, WI 53706 USA, Email: ndeleongatti@wisc.edu

*Correspondence to:* Francisco Muñoz-Arriola

**Abstract.** The performance of numerical, statistical, and data-driven diagnostic and predictive crop production modeling heavily relies on data quality for input and calibration/validation processes. This study presents a comprehensive database and the analytics used to consolidate it as a homogeneous, consistent, and multi-dimensional genotype, phenotypic, and environmental database for maize phenotype modeling, diagnostics, and prediction. The data used is obtained from the Genomes to Fields (G2F) initiative, which provides multi-year genomic (G), environmental (E), and phenotypic (P) datasets that can be used to train and test crop growth models to understand the genotype by environment (GxE) interaction phenomenon. A particular advantage of the G2F database is its diverse set of maize genotype DNA sequences (G2F-G), phenotypic measurements (G2F-P), station-based environmental time series (mainly, climatic data) observations collected during the maize growing season (G2F-E), and metadata for each field trials (G2F-M) across the U.S. the province of Ontario in Canada, and the state of Niedersachsen in Germany. The construction of this comprehensive climate and genomic database incorporates the analytics for data quality control (QC) and consistency control (CC) to consolidate the digital representation of geospatially distributed environmental and genomic data required for phenotype predictive analytics and modeling the GxE interaction. The two-phase QC-CC pre-processing algorithm also includes a module to estimate environmental uncertainties. Generally, this data pipeline collects raw files, checks their formats, corrects data structures, and identifies and cures/imputes missing data. This pipeline uses machine learning techniques to fulfill the environmental time series gaps and quantifies the uncertainty introduced by using other data sources for gaps imputation in G2F-E, discards the missing values in G2F-P, and removes rare variants in G2F-G. Finally, an integrated and enhanced multi-dimensional database is generated. The analytics for improving the G2F database and the improved database called “CLIM4OMICS” (v1.0 and v2.0) follows the FAIR principles, and all the digital resources are available at <http://doi.org/10.5281/zenodo.7490246> and <http://doi.org/10.5281/zenodo.8060807>, respectively.

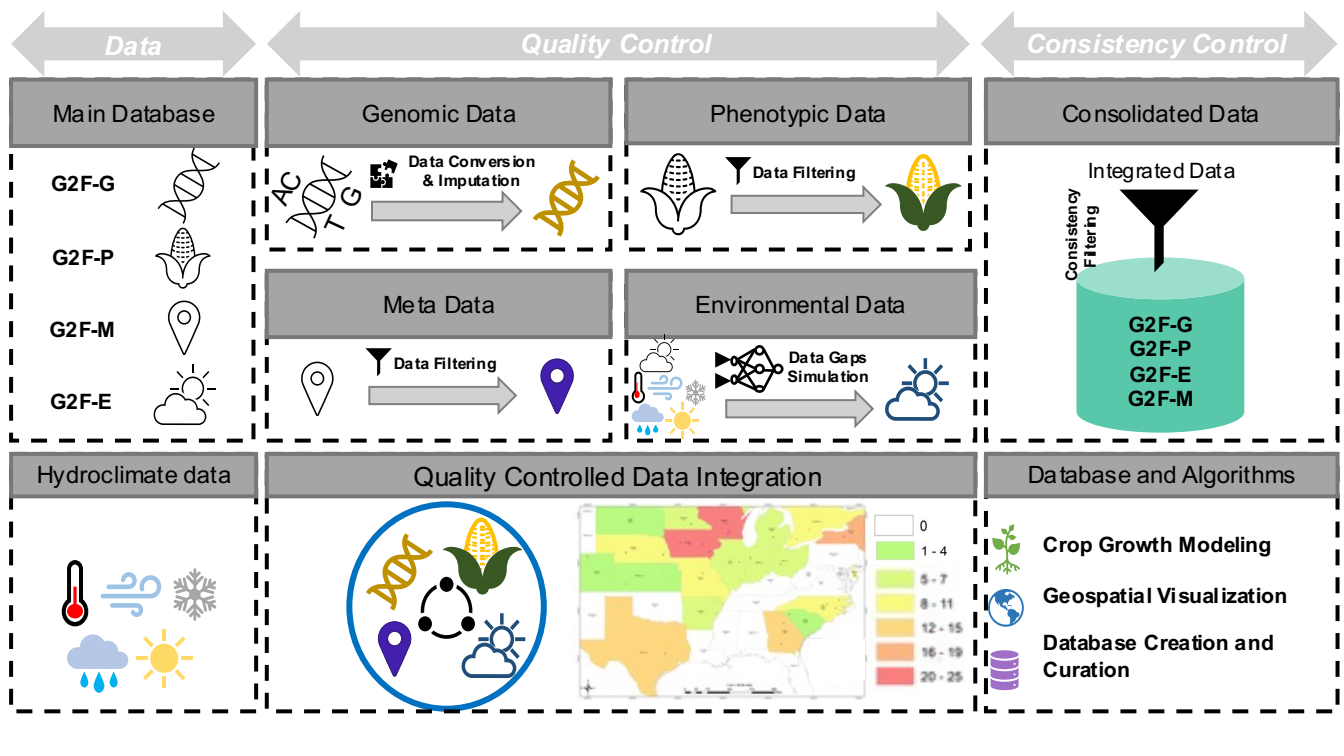

35 **Figure 1. A conceptual framework of quality and consistency control algorithms for the multidimensional Genomes to Fields (G2F) OMICs and hydroclimatic database. “G2F-G” denotes G2F genomic data, “G2F-P” denotes G2F phenotypic data, “G2F-M” denotes G2F metadata, and “G2F-E” denotes G2F environmental data. The map indicates the locations and number of sites per state used in by the G2F initiative and represented in the CLIM4OMICs (the map is expanded as Supplementary Figure 1).**

Keys: ['Genotypes', 'Positions', 'Taxa', '\_\_\_DATA\_TYPES\_\_\_']

Genotype Length: ValuesViewHDF5(<HDF5 group "/Genotypes" (1579 members)>)

Shape:

<HDF5 dataset "AncestralAlleles": shape (945574,), type "<i4">  
<HDF5 dataset "ChromosomeIndices": Shape (945574,), type "<i4">  
<HDF5 dataset "Chromosomes": shape (10,), type "|0">  
<HDF5 dataset "Positions": shape (945574,), type "<i4">  
<HDF5 dataset "ReferenceAlleles": shape (945574,), type "<i4">  
<HDF5 dataset "Snplds": shape (945574,), type "|S15">

Genotypes Data:

(CML442-B  
(LAMA2002-23-3-B  
(LAMA2002-3S-2-B-B-B-B  
(TX736)\_( (TX772\_X\_T246)\_X\_TX772) - 1-5-B-B-B-B-B6-B6-B2-B13: 100000550  
(TX739)\_LAMA2002-10-1-B-B-B-B3-B7\_ORANGE-B: 100000510  
(Tx736) ((Tx772xT246)xTx772) -1-5-B-B-B-B-B6-B12-B2-B13:100000968  
(Tx739) LAMA2002- 10-1-B-B-B-B3-B7orange-B7-B11:108900969  
2FACC: 100000938  
2FACC: 100001100  
2MCDB: 100000307  
2MCDE: 100000475  
3IIH6: 100000120  
4N506: 100000586  
511011-1-1-B: 100000114  
511815-1-1-B: 100000115  
511828-1-1-B: 100000142  
511837-1-1-B: 100000136  
511842-1-1-B: 100000119  
511865-1-1-B: 100000117

**Figure 2. A screenshot of the raw G2F-G data file stored in a single HDF file showing a portion of the complex hierarchical data structure of SNPs sequences.**

Table 1. Overview of raw G2F-G data illustrating the genotyping by sequencing the molecular marker sequences of different hybrids stored in a single HDF-format file. The first column shows the maize hybrid codes and the first row shows the locus information. The A, T, G, C, and R letters are a sample of the major and minor alleles at different marker positions. The letter N denotes the missing markers in a genetic sequence at each molecular site. The source file directory for the genetic data is in “File Upload/Genotype/Markers.txt” in the database package.

45

|                        | S5_6909629 | S5_6909636 | S5_6909641 | S5_6909643 | S5_6913083 | S5_6913100 | S5_6913110 | S5_6913228 | S5_6913526 | S5_6913532 | S5_6913539 | S5_6913547 | S5_6913566 |
|------------------------|------------|------------|------------|------------|------------|------------|------------|------------|------------|------------|------------|------------|------------|
| BLANK:100000001        | N          | N          | N          | N          | N          | N          | N          | N          | N          | N          | N          | N          | N          |
| BLANK:100000002        | N          | N          | N          | N          | N          | N          | N          | N          | N          | N          | N          | N          | N          |
| BLANK:100000003        | N          | N          | N          | N          | N          | N          | N          | N          | N          | N          | N          | N          | N          |
| PHN11 Oh43 0075:100... | C          | C          | G          | C          | T          | G          | T          | G          | G          | A          | T          | G          | A          |
| W10004 0248 1000000... | C          | T          | G          | C          | T          | G          | T          | R          | A          | G          | T          | G          | G          |
| AS6103:100000006       | C          | T          | G          | C          | T          | G          | T          | G          | G          | A          | T          | G          | A          |
| PHN11 LH145 0029:10... | C          | C          | G          | C          | T          | G          | T          | G          | G          | A          | T          | G          | A          |
| W10005 0107:1000000... | C          | C          | G          | C          | T          | G          | T          | G          | G          | A          | T          | G          | A          |
| W10005 0032:1000000... | C          | C          | G          | C          | T          | G          | T          | G          | G          | A          | T          | G          | A          |
| W10004 0082:1000000... | N          | N          | N          | N          | N          | N          | N          | N          | G          | A          | T          | G          | A          |
| PHN11 LH145 0028:10... | C          | C          | G          | C          | T          | G          | T          | G          | G          | A          | T          | G          | A          |

50 Table 2. Overview of the raw G2F-P data stored in “.csv” file format showing detailed information of the phenotypic observations  
 in 2014 as one example of the multi-year data. The “Year” column shows the year of the a specific G2F experiment, “Field-Location”  
 column shows the 4-character name of G2F experiment consisting of the state abbreviation in the two first characters and the name  
 of the hybrid experiment in the last two characters tested in that state, the “Recid” column shows the ID of the phenotypic record,  
 55 the “Source” column shows the source of the collected phenotypic sample portal, the “Plant Height [cm]” column shows the height  
 of the plant in [cm], the “Ear height [cm]” column shows the height of the ear in [cm], the “Stand Count [plants]” column shows the  
 number of plants per plot at harvest, the “Root Lodging [plants]” column shows the number of plants that show the root lodging  
 per plot, the “Stalk Lodging [plants]” column shows the number of broken plants per plot at harvest, and the “Grain Moisture [%]”  
 column shows the percentage of the water content in plant at harvest. The other phenotypic variables have been measured and  
 60 stored in similar columns. The blank cells represent the missing values of phenotypic observations. The source file directory for the  
 phenotypic data example is in “File Upload/Phenotype/g2f\_2014\_hybrid\_data\_clean.csv” in the database package.

| Year | Field-Location | Recid   | Source                      | Pedigree                      | Plant Height [cm] | Ear Height [cm] | Stand Count [plants] | Root Lodging [plants] | Stalk Lodging [plants] | Grain Moisture [%] | Test Weight [lbs bu <sup>-1</sup> ] | Plot Weight [lbs] | Grain Yield [bu A <sup>-1</sup> ] |
|------|----------------|---------|-----------------------------|-------------------------------|-------------------|-----------------|----------------------|-----------------------|------------------------|--------------------|-------------------------------------|-------------------|-----------------------------------|
| 2014 | DEH1           | 2209111 | WE13-195ISO-049-X-POL-195   | MOG_PHG83-129-1-1-1-1-B/LH195 | 186               | 104             | 40                   | 0                     | 4                      | 18                 | 54.1                                | 10.04             | 98.29                             |
| 2014 | DEH1           | 2209430 | 13WJWE:LH185:2073           | M0039/LH185                   | 172               | 85              | 37                   | 0                     | 0                      | 19.5               |                                     | 18.8              | 180.69                            |
| 2014 | DEH1           | 2209118 | WE13-195ISO-390-X-POL-195.3 | MOG_MO45-055-1-1-1-1-B/LH195  | 230               | 109             | 37                   | 0                     | 1                      | 16.7               | 54.3                                | 12.59             | 125.21                            |
| 2014 | DEH1           | 2209199 | 13WJWE:LH185:2865           | Z022E0130/LH185               | 237               | 103             | 36                   | 0                     | 0                      | 18.7               | 54.3                                | 8.26              | 80.17                             |
| 2014 | DEH1           | 2209513 | 13WJWE:LH185:2601           | W10004_0032/LH185             | 166               | 77              | 35                   | 0                     | 0                      | 18                 |                                     | 15.8              | 154.68                            |
| 2014 | DEH1           | 2209203 | 13WJWE:LH185:2847           | Z022E0046/LH185               | 266               | 136             | 35                   | 0                     | 0                      | 19.3               | 55.7                                | 15.39             | 148.28                            |
| 2014 | DEH1           | 2209208 | 13WJWE:LH185:2661           | Z013E0028/LH185               | 228               | 115             | 35                   | 0                     | 0                      | 18.8               | 55.9                                | 12.6              | 122.15                            |
| 2014 | DEH1           | 2209182 | 13WJWE:LH185:2856           | Z022E0009/LH185               | 234               | 103             | 33                   | 0                     | 0                      | 20.2               | 52.3                                | 10.81             | 102.99                            |
| 2014 | DEH1           | 2209086 | WE13-195ISO-361-X-POL-195   | B73_NC230-041-1-1-1-1/LH195   | 227               | 125             | 26                   | 0                     | 0                      | 19.3               | 53.9                                | 10.86             | 104.63                            |
| 2014 | DEH1           | 2209169 | 13WJWE:LH185:2013           | M0355/LH185                   | 248               | 123             | 24                   | 0                     | 0                      | 18.9               | 55.3                                | 8.41              | 81.43                             |
| 2014 | DEH1           | 2209156 | 13WJWE:LH185:2214           | M0172/LH185                   |                   |                 |                      |                       |                        |                    |                                     |                   |                                   |
| 2014 | DEH1           | 2209168 | 13WJWE:LH185:2205           | M0114/LH185                   |                   |                 |                      |                       |                        |                    |                                     |                   |                                   |
| 2014 | DEH1           | 2209170 | 13WJWE:LH185:2073           | M0039/LH185                   |                   |                 |                      |                       |                        |                    |                                     |                   |                                   |
| 2014 | DEH1           | 2209160 | 13WJWE:LH185:2046           | M0378/LH185                   |                   |                 |                      |                       |                        |                    |                                     |                   |                                   |
| 2014 | DEH1           | 2209148 | 13WJWE:LH185:2055           | M0266/LH185                   |                   |                 |                      |                       |                        |                    |                                     |                   |                                   |

65 Table 3. Overview of raw G2F-E data stored in “.csv” file format showing the environmental time series in tabular format for 2014  
 70 as one example of the multi-year data. The “Record Number” column shows the number of weather station records in each  
 experiment, the “Experiment” column shows the 4-character name of G2F experiment consisting of the state abbreviation in the  
 two first characters and the name of the hybrid experiment in the last two characters tested in that state, the “Station ID” column  
 shows the ID of the weather station, “NWS Network” and “NWS Station” columns show the nearest NWS network and station has  
 been used for initial QC by the G2F collaborators, the “Day [Local]”, “Month [Local]”, “Year [Local]”, and “Day of Year [Local]”  
 columns show the local day, month, year, and day of year of the weather record, “Daytime [UTC]” column shows the coordinated  
 universal time, “Temperature [C]”, “Dew Point [C]”, “Relative Humidity [%]”, “Solar Radiation [W m<sup>2</sup>]”, “Rainfall [mm]”, “  
 Wind Speed [m s<sup>-1</sup>]”, Wind Direction [degrees]”, and “Wind Gust [m s<sup>-1</sup>]” column shows the hydroclimatic time series. The blank  
 cells represent the missing values of phenotypic observations. The source file directory for the environmental data example is in  
 “File Upload/Environment/g2f\_2014\_weather.csv”, in the database package.

| Record Number | Experiment | Station ID | NWS Network | NWS Station | Day [Local] | Month [Local] | Year [Local] | Day of Year [Local] | Time [Local] | Datetime [UTC]   | Temperature [C] | Dew Point [C] | Relative Humidity [%] | Solar Radiation [W m <sup>2</sup> ] | Rainfall [mm] | Wind Speed [m s <sup>-1</sup> ] | Wind Direction [degrees] | Wind Gust [m s <sup>-1</sup> ] |
|---------------|------------|------------|-------------|-------------|-------------|---------------|--------------|---------------------|--------------|------------------|-----------------|---------------|-----------------------|-------------------------------------|---------------|---------------------------------|--------------------------|--------------------------------|
| 191           | DEH1       | 9079       | DE_ASOS     | GED         | 13          | 5             | 2014         | 133                 | 14:00:00     | 5/13/14<br>18:00 | 22.89           | 14.33         | 58.2                  | 942                                 | 0             | 4.47                            | 18                       | 7.6                            |
| 192           | DEH1       | 9079       | DE_ASOS     | GED         | 13          | 5             | 2014         | 133                 | 14:30:00     | 5/13/14<br>18:30 | 21.78           | 13.89         | 60.5                  | 918                                 | 0             | 4.92                            | 40                       | 7.6                            |
| 193           | DEH1       | 9079       | DE_ASOS     | GED         | 13          | 5             | 2014         | 133                 | 15:00:00     | 5/13/14<br>19:00 | 21.56           | 13.17         | 58.4                  | 855                                 | 0             | 4.02                            | 21                       | 6.71                           |
| 194           | DEH1       | 9079       | DE_ASOS     | GED         | 13          | 5             | 2014         | 133                 | 15:30:00     | 5/13/14<br>19:30 | 20.83           | 12.89         | 60                    | 778                                 | 0             | 4.47                            | 14                       | 7.15                           |
| 195           | DEH1       | 9079       | DE_ASOS     | GED         | 13          | 5             | 2014         | 133                 | 16:00:00     | 5/13/14<br>20:00 | 20.72           | 12.72         | 59.8                  | 728                                 | 0             | 4.92                            | 351                      | 7.15                           |
| 196           | DEH1       | 9079       | DE_ASOS     | GED         | 13          | 5             | 2014         | 133                 | 16:30:00     | 5/13/14<br>20:30 | 20.22           | 12.83         | 62                    | 642                                 | 0             | 4.02                            | 19                       | 6.26                           |
| 197           | DEH1       | 9079       | DE_ASOS     | GED         | 13          | 5             | 2014         | 133                 | 17:00:00     | 5/13/14<br>21:00 | 20.06           | 12.67         | 62.1                  | 552                                 | 0             | 3.58                            | 354                      | 5.81                           |
| 198           | DEH1       | 9079       | DE_ASOS     | GED         | 13          | 5             | 2014         | 133                 | 17:30:00     | 5/13/14<br>21:30 | 19.28           | 12.89         | 66                    | 452                                 | 0             | 4.47                            | 5                        | 6.26                           |
| 199           | DEH1       | 9079       | DE_ASOS     | GED         | 13          | 5             | 2014         | 133                 | 18:00:00     | 5/13/14<br>22:00 | 17.89           | 12.78         | 71.6                  | 350                                 | 0             | 4.92                            | 32                       | 5.81                           |
| 200           | DEH1       | 9079       | DE_ASOS     | GED         | 13          | 5             | 2014         | 133                 | 18:30:00     | 5/13/14<br>22:30 |                 |               | 75.9                  | 284                                 | 0             | 4.47                            | 25                       | 5.81                           |
| 201           | DEH1       | 9079       | DE_ASOS     | GED         | 13          | 5             | 2014         | 133                 | 19:00:00     | 5/13/14<br>23:00 | 16              | 12.5          | 79.6                  | 155                                 | 0             | 3.58                            | 36                       | 5.36                           |
| 202           | DEH1       | 9079       | DE_ASOS     | GED         | 13          | 5             | 2014         | 133                 | 19:30:00     | 5/13/14<br>23:30 | 14.94           | 12.22         | 83.7                  | 79                                  | 0             | 3.58                            | 25                       | 6.26                           |
| 203           | DEH1       | 9079       | DE_ASOS     | GED         | 13          | 5             | 2014         | 133                 | 20:00:00     | 5/14/14<br>0:00  | 14.06           | 12            | 87.4                  | 8                                   | 0             | 4.02                            | 33                       | 6.26                           |
| 204           | DEH1       | 9079       | DE_ASOS     | GED         | 13          | 5             | 2014         | 133                 | 20:30:00     | 5/14/14<br>0:30  | 13.67           | 12            | 89.8                  | 0                                   | 0             | 3.13                            | 12                       | 5.36                           |
| 205           | DEH1       | 9079       | DE_ASOS     | GED         | 13          | 5             | 2014         | 133                 | 21:00:00     | 5/14/14<br>1:00  | 13.22           | 12.17         | 93.3                  | 0                                   | 0             | 3.13                            | 9                        | 5.36                           |

75

**Table 4. Overview of raw G2F-M data stored in “.csv” file format showing the metadata collected for the 2014 experiments as one example of the multi-year data. The “Location Name” column shows the state and the number of the experiment in that state, the “Type” column shows the type of the experiment which can be hybrid or inbred, the “Experiment” column shows the 4-character name of G2F experiment consisting of the state abbreviation in the two first characters and the name of the hybrid experiment in the last two characters tested in that state, the “City” column shows the city that the experiment located at, the “Farm” column shows the name of the farm that the experiment has been tested in, the “Field” column shows the name of the field of the experiment, and “lon” and “lat” columns show the longitude and the latitude of the weather station installed in the field. The source file directory for the metadata example is in “File Upload/Meta/g2f\_2014\_field\_characteristics.csv” in the database package.**

| Location name | Type   | Experiment | City            | Farm                                                  | Field     | lon     | lat    |
|---------------|--------|------------|-----------------|-------------------------------------------------------|-----------|---------|--------|
| DE            | hybrid | DEH1       | Georgetown      | Elbert N. & Ann V. Carvel Research & Education Center | 27AB      | -75.20  | 38.63  |
| GA            | hybrid | GAH1       | Tifton          | Bellflower                                            | 18        | -83.55  | 31.50  |
| IA1           | hybrid | IAH1       | Ames            | Worle                                                 |           | -93.69  | 41.99  |
| IA2           | hybrid | IAH2       | Carroll         |                                                       |           | -94.72  | 42.06  |
| IA3           | hybrid | IAH3       | Keystone        |                                                       |           | -92.25  | 41.98  |
| IA4           | hybrid | IAH4       | Crawfordsville  | Southeast Research Farm                               | 14        | -91.48  | 41.19  |
| IL1           | hybrid | ILH1       | Urbana          | Maxwell Farms                                         | MF500     | -88.23  | 40.06  |
| IN            | hybrid | INH1       | West Lafayette  | Purdue ACRE                                           | 97/98     | -87.00  | 40.48  |
| MN            | hybrid | MNH1       | Waseca          | Southern Research & Outreach Center                   | NA        | -93.53  | 44.06  |
| MO1           | hybrid | MOH1       | Columbia        | Bradford                                              | C1a       | -92.20  | 38.89  |
| MO2           | hybrid | MOH2       | Columbia        | Rollins=Hinkson Creek Bottoms                         | block 5   | -92.35  | 38.92  |
| NC            | hybrid | NCH1       | Kinston         | Cunningham Research Farm                              | L block 5 | -77.57  | 35.29  |
| NE1           | hybrid | NEH1       | Lincoln         | East Campus                                           | 1807      | -96.65  | 40.83  |
| NE2           | hybrid | NEH2       | North Platte    | Dryland farm                                          |           | -100.74 | 41.05  |
| NE3           | hybrid | NEH3       | Brule           | North Dryland                                         | West 1/4  | -101.99 | 41.16  |
| NY1           | hybrid | NYH1       | Aurora          | Musgrave Research Farm                                | J         | -76.65  | 42.72  |
| NY2           | hybrid | NYH2       | Aurora          | Musgrave                                              | E4        | -76.65  | 42.73  |
| ON1           | hybrid | ONH1       | Waterloo        | Rosdendale                                            | Huras     | -80.42  | 43.49  |
| ON2           | hybrid | ONH2       | Ridgetown       | On Campus                                             | Range 5   | -81.88  | 42.45  |
| TX1           | hybrid | TXH1       | College Station | University Farm                                       | 224       | -96.43  | 30.54  |
| TX2           | hybrid | TXH2       | halfway         | Halfway                                               | pivot     | -101.94 | 34.18  |
| WI            | hybrid | WIH1       | Madison         | West Madison                                          | M1400     | -89.53  | 43.057 |

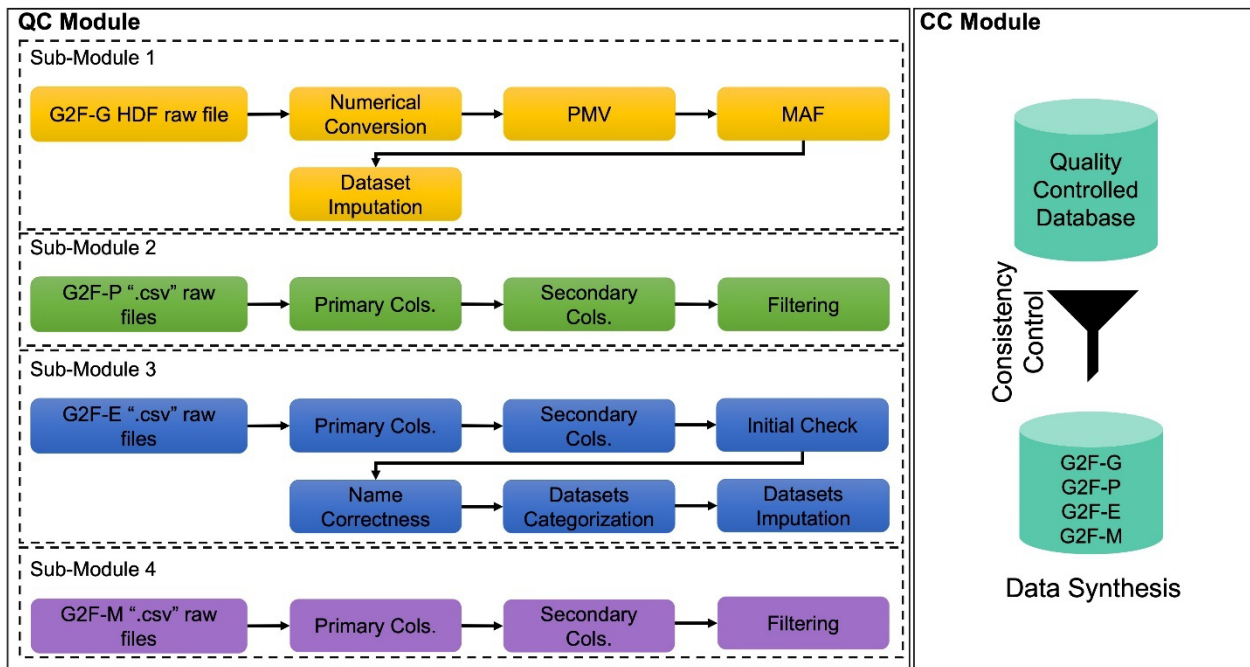

Figure 3. The overall algorithmic QC-CC framework for G2F database. The “G2F-G,” “G2F-P,” “G2F-E,” and “G2F-M” denote the G2F genomic, phenotypic, environmental, and meta data, respectively. The “PMV” and “MAF” denote the percent missing values and minor allele frequency, respectively. The “Primary Cols.” and “Secondary Cols.” denote primary and secondary columns, respectively.



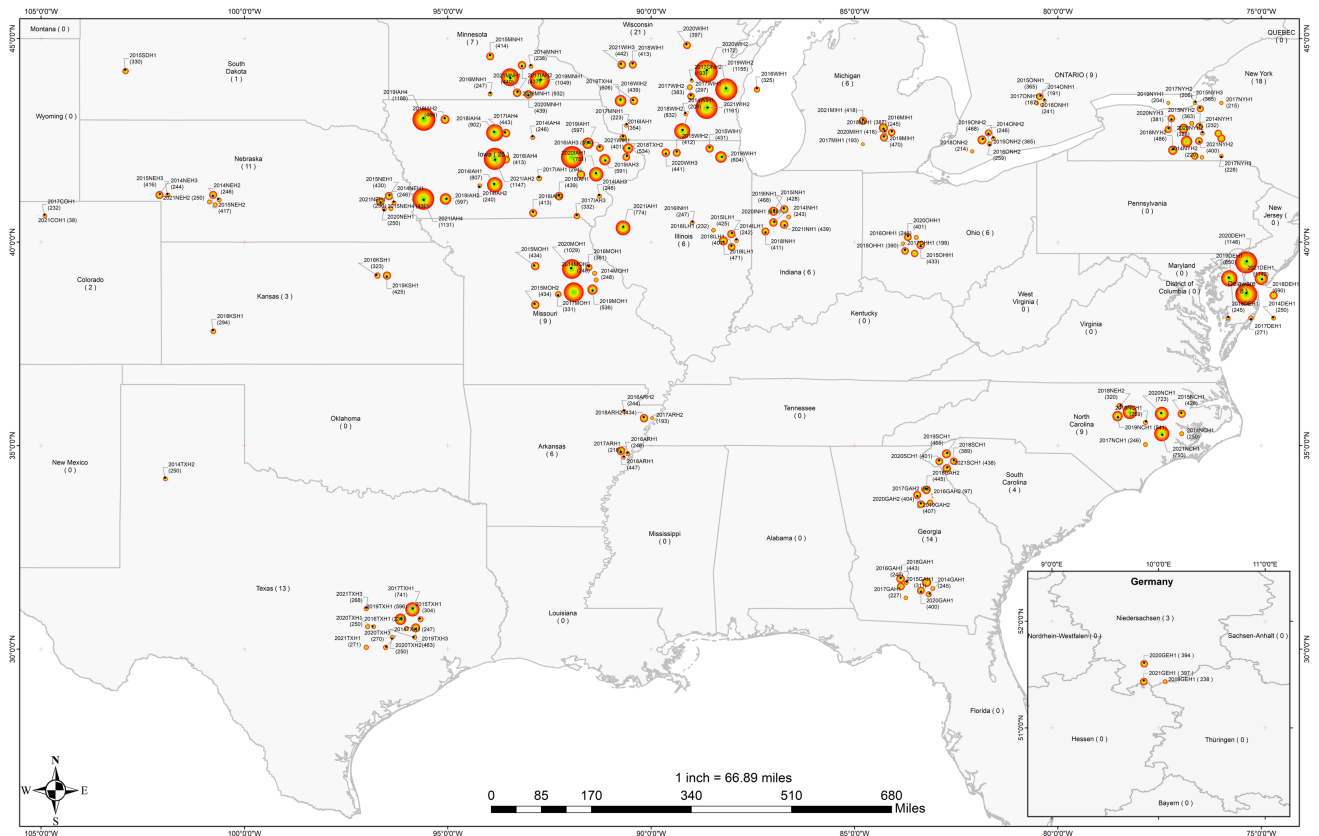

**Figure 4. The spatial distribution of phenotypic records of G2F experiments in the U.S. regions and the province of Ontario in Canada between 2014. And 2021. The state of Niedersachsen in Germany includes the years 2018, 2020, and 2021 for three locations. The location of each station in the map was modified for visualization purposes, allowing the illustration of stations with multi-year records. The size of the circle represents the number of years sampled, which also appears within the parenthesis next to the year at each site. The colors of the circles were included for visualization purposes only.**

95 Table 5. Record of a single of G2F-P dataset. It shows the phenotypic measurements including “Plant Height (cm),” “Ear Height (cm),” “Grain Moisture (%)” and “Grain Yield (bu A<sup>-1</sup>)” for a maize hybrid with pedigrees of “B37” and “MO17” collected in “2014-DEH1” experiment located in Delaware in 2014. The ID of the record is “2014\_DEH1\_B37/MO17, and the ID of the experiment is “2014DEH1”. The “H” denotes the hybrid type of the experiment, “P1” and “P2” denote the pedigrees of the maize hybrid, and “DE” denotes the state of Delaware.

| ID                 | Year | Location | Experiment | Experiment ID | Pedigree | P1  | P2   | Plant Height (cm) | Ear Height (cm) | Grain Moisture (%) | Grain Yield (bu A <sup>-1</sup> ) |
|--------------------|------|----------|------------|---------------|----------|-----|------|-------------------|-----------------|--------------------|-----------------------------------|
| 2014_DEH1_B37/MO17 | 2014 | DEH1     | 2014-DEH1  | 2014DEH1      | B37/MO17 | B37 | MO17 | 235               | 139.5           | 19.2               | 217.2                             |

**Table 6. The percentage of complete, empty, and incomplete portions of time series for each G2F hydroclimatic variable: Temperature (T), Dew Point (DP), Relative Humidity (RH), Solar Radiation (SR), Rainfall (R), Wind Speed (WS), Wind Direction (WD).**

|            | T<br>(°C) | DP<br>(°C) | RH<br>(%) | SR<br>(W m <sup>-2</sup> ) | R<br>(mm) | WS<br>(m s <sup>-1</sup> ) | WD<br>(degrees) |   |
|------------|-----------|------------|-----------|----------------------------|-----------|----------------------------|-----------------|---|
| Complete   | 78.6      | 69.6       | 79.2      | 37.6                       | 84.3      | 76.4                       | 23.6            | - |
| Empty      | 0         | 6.1        | 0.5       | 11.8                       | 0         | 1.1                        | 1.6             | - |
| Incomplete | 21.4      | 24.3       | 20.3      | 50.6                       | 16.7      | 22.5                       | 74.8            | - |

105

110 **Table 7. Record of a single example of G2F-E dataset. It shows the observed hydroclimate data including “Temperature (°C),” “Dew Point (°C),” “Relative Humidity (%),” “Solar Radiation (W m<sup>-2</sup>),” “Rainfall (mm),” “Wind Speed (m s<sup>-1</sup>),” “Wind Direction (degrees),” and “Wind Gust (m s<sup>-1</sup>)” collected by weather station with ID of “9079” for “2014DEH1” experiment located in Delaware on 9 May 2014 at 15:00:00 local time. The ID of the experiment is “2014DEH1”. The “H” denotes hybrid type of the experiment, and “DE” denotes the state of Delaware.**

| Record Number | Station ID | Location | Experiment ID | Day [Local] | Month [Local] | Year [Local] | Day of Year [Local] | Time [Local] | Temperature (°C) | Dew Point (°C) | Relative Humidity (%) | Solar Radiation (W m <sup>-2</sup> ) | Rainfall (mm) | Wind Speed (m s <sup>-1</sup> ) | Wind Direction (degrees) | Wind Gust (m s <sup>-1</sup> ) |
|---------------|------------|----------|---------------|-------------|---------------|--------------|---------------------|--------------|------------------|----------------|-----------------------|--------------------------------------|---------------|---------------------------------|--------------------------|--------------------------------|
| 1             | 9079       | DEH1     | 2014DEH1      | 9           | 5             | 2014         | 129                 | 15:00:00     | 23.06            | 15.78          | 63.2                  | 887                                  | 0             | 1.79                            | 32                       | 4.02                           |

115

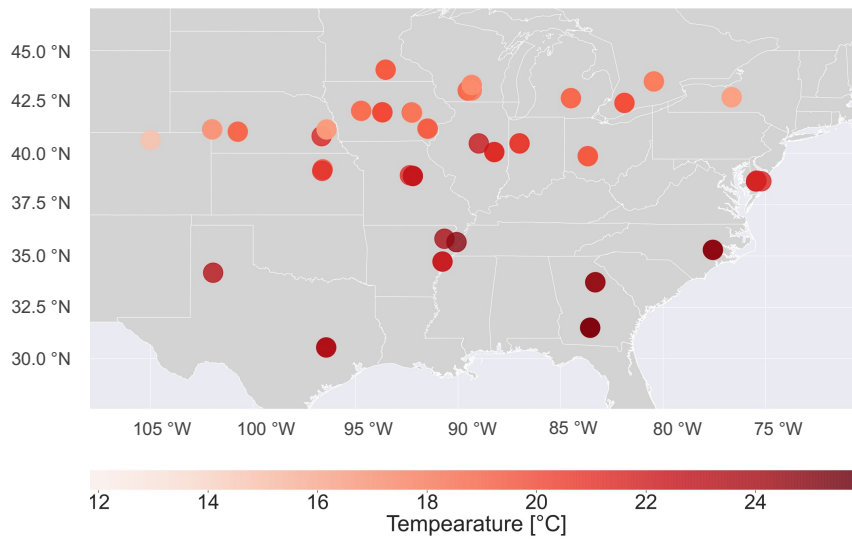

(a)

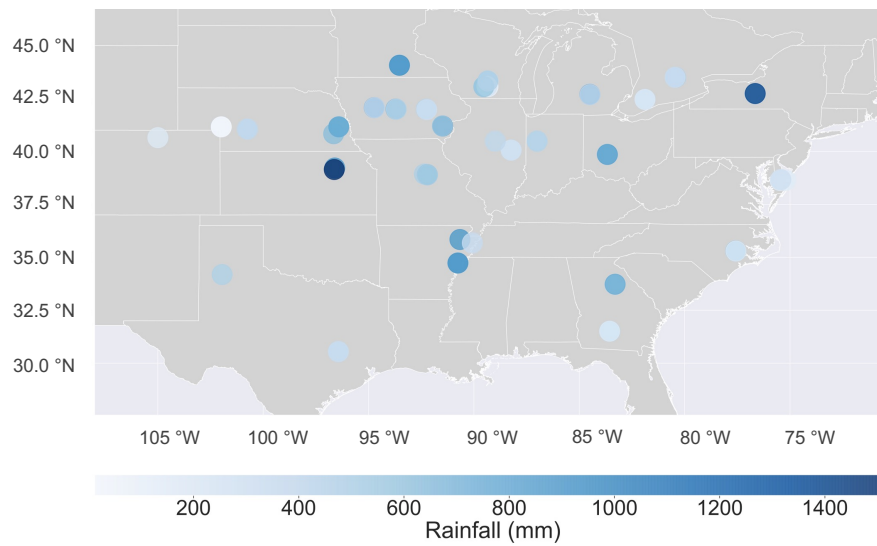

(b)

**Figure 5. The spatial distribution of (a) improved mean temperature ( $T_{\text{mean}}$ ) and (b) improved accumulated rainfall ( $R_{\text{acc}}$ ) records in G2F-E database during the maize growing season in all G2F experimental fields in 2014-2017.**

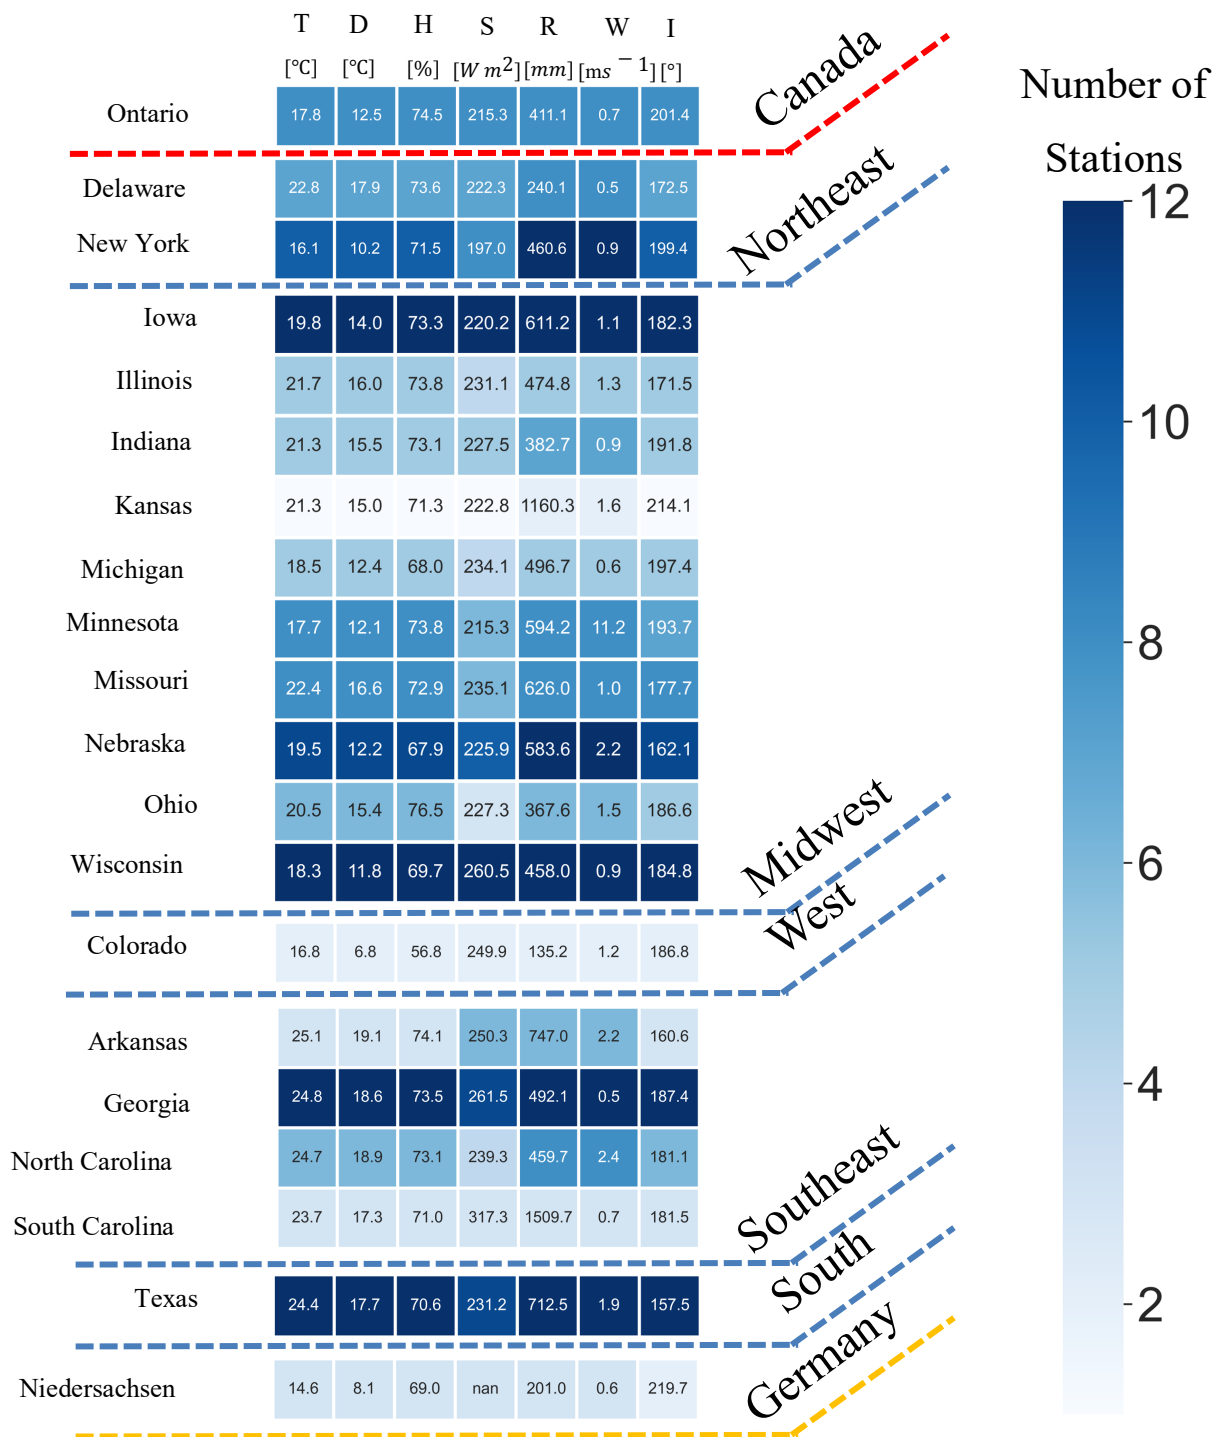

**Figure 6. The heatmap for number of G2F experiments in the U.S. regions and the province of Ontario in Canada between 2014. And 2021. The state of Niedersachsen in Germany includes the years 2018, 2020, and 2021 for three locations. The color shows the number of stations in each state. The number in each cell represents the average of hydroclimatic variables in each state including mean of Temperature (T), mean of Dew Point (D), mean of Relative Humidity (R), mean of Solar Radiation (S), accumulative Rainfall (R), mean of Wind Speed (W), and mean of Wind Direction (I).**

**Table 8. Record of a single of G2F-M dataset. It shows the location including “Lat” and “Lon” of the “2014DEH1” experiment located in Delaware in 2014. The ID of the experiment is “2014DEH1”. The “Lat” denotes latitude, “Lon” denotes longitude, “H” denotes the hybrid type of the experiment, and “DE” denotes the state of Delaware.**

| Experiment | Experiment ID | Experiment type | Year | State | Lat   | Lon    |
|------------|---------------|-----------------|------|-------|-------|--------|
| DEH1       | 2014DEH1      | H               | 2014 | DE    | 38.63 | -75.20 |

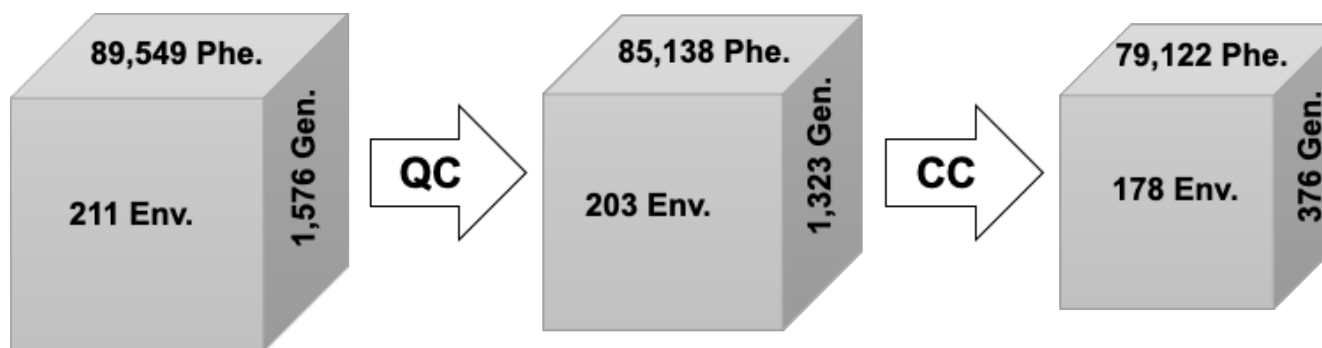

**Figure 7. The number of observations of G2F-Gen. (genomic data), G2F-Phe. (phenotypic data), and G2F-Env. (environmental data) in the original database, quality-controlled database, and the consistency-controlled database. The QC and CC refer to quality and consistency control algorithms.**



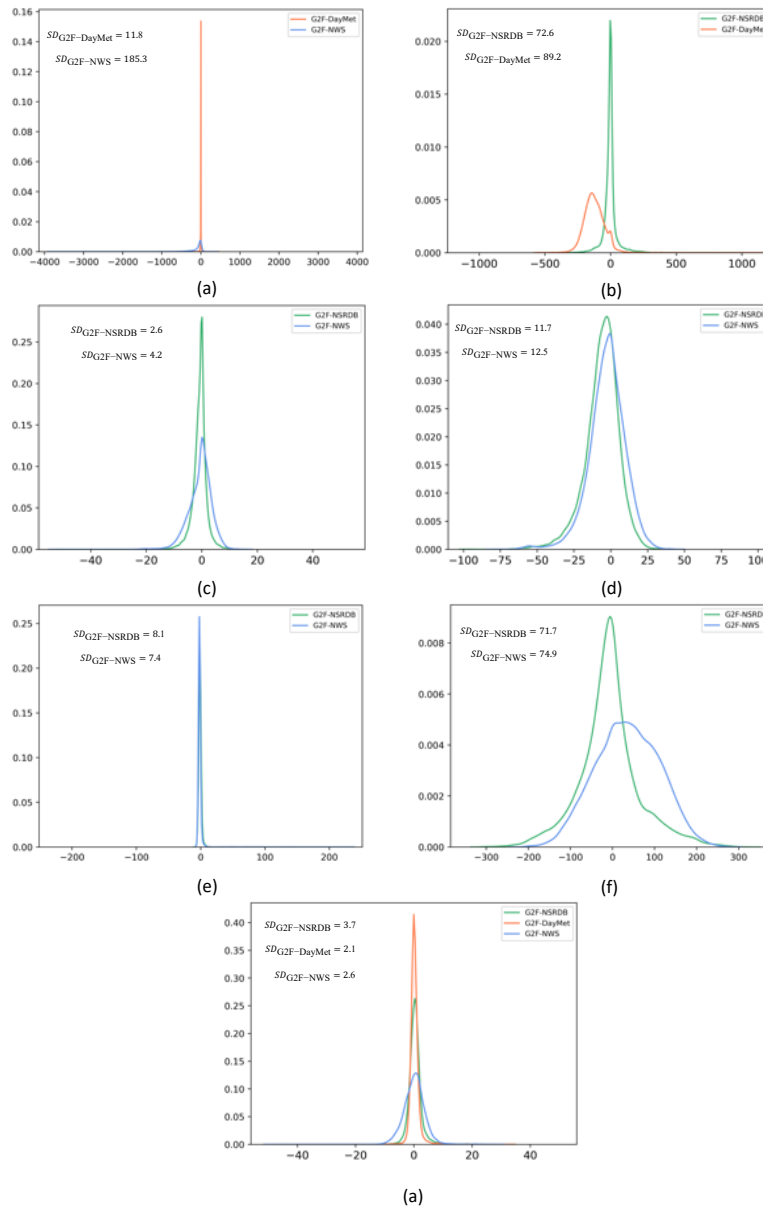

135

**Figure 8.** The probability distribution function (PDF) of the error values for (a) rainfall (Err-R), (b) solar radiation (Err-S), (c) dew point (Err-D), (d) relative humidity (Err-H), (e) wind speed (Err-W), (f) wind direction (Err-I), and (g) temperature (Err-T). Note that each of the external environmental data sources may not contain all the G2F hydroclimatic variables. The error term has been calculated for the common variables between G2F and each of the data sources. The  $SD_{G2F-NSRDB}$  denotes the standard deviation of the errors between G2F and NSRDB, the  $SD_{G2F-DayMet}$  denotes the standard deviation of the errors between G2F and DayMet, and  $SD_{G2F-NWS}$  denotes the standard deviation of the errors between G2F and NWS for a given climatic variable.

140

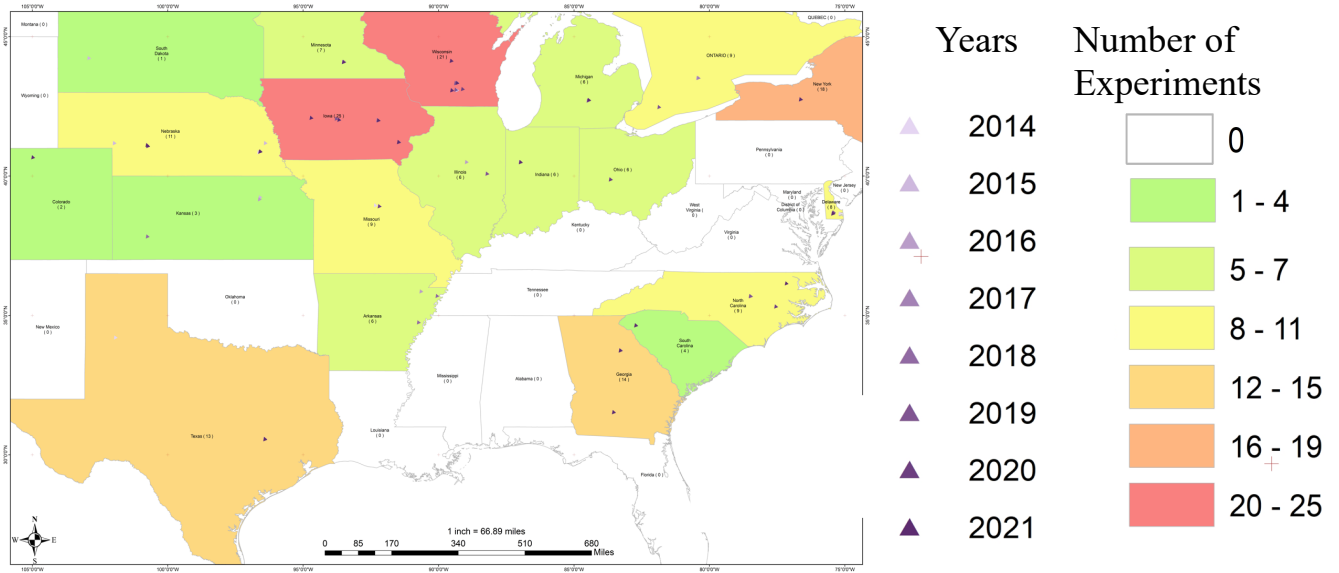

145

**Supp. Figure 1. Locations, years, and number of sites per state used in by the G2F initiative and represented in the CLIM4OMICS.**

150

155

160

165

170

175

**Figure 1. A conceptual framework of quality and consistency control algorithms for the multidimensional Genomes to Fields (G2F) OMICs and hydroclimatic database. “G2F-G” denotes G2F genomic data, “G2F-P” denotes G2F phenotypic data, “G2F-M” denotes G2F metadata, and “G2F-E” denotes G2F environmental data. The map indicates the locations and number of sites per state used in by the G2F initiative and represented in the CLIM4OMICS (the map is expanded as Supplementary Figure 1).**

180

185

190

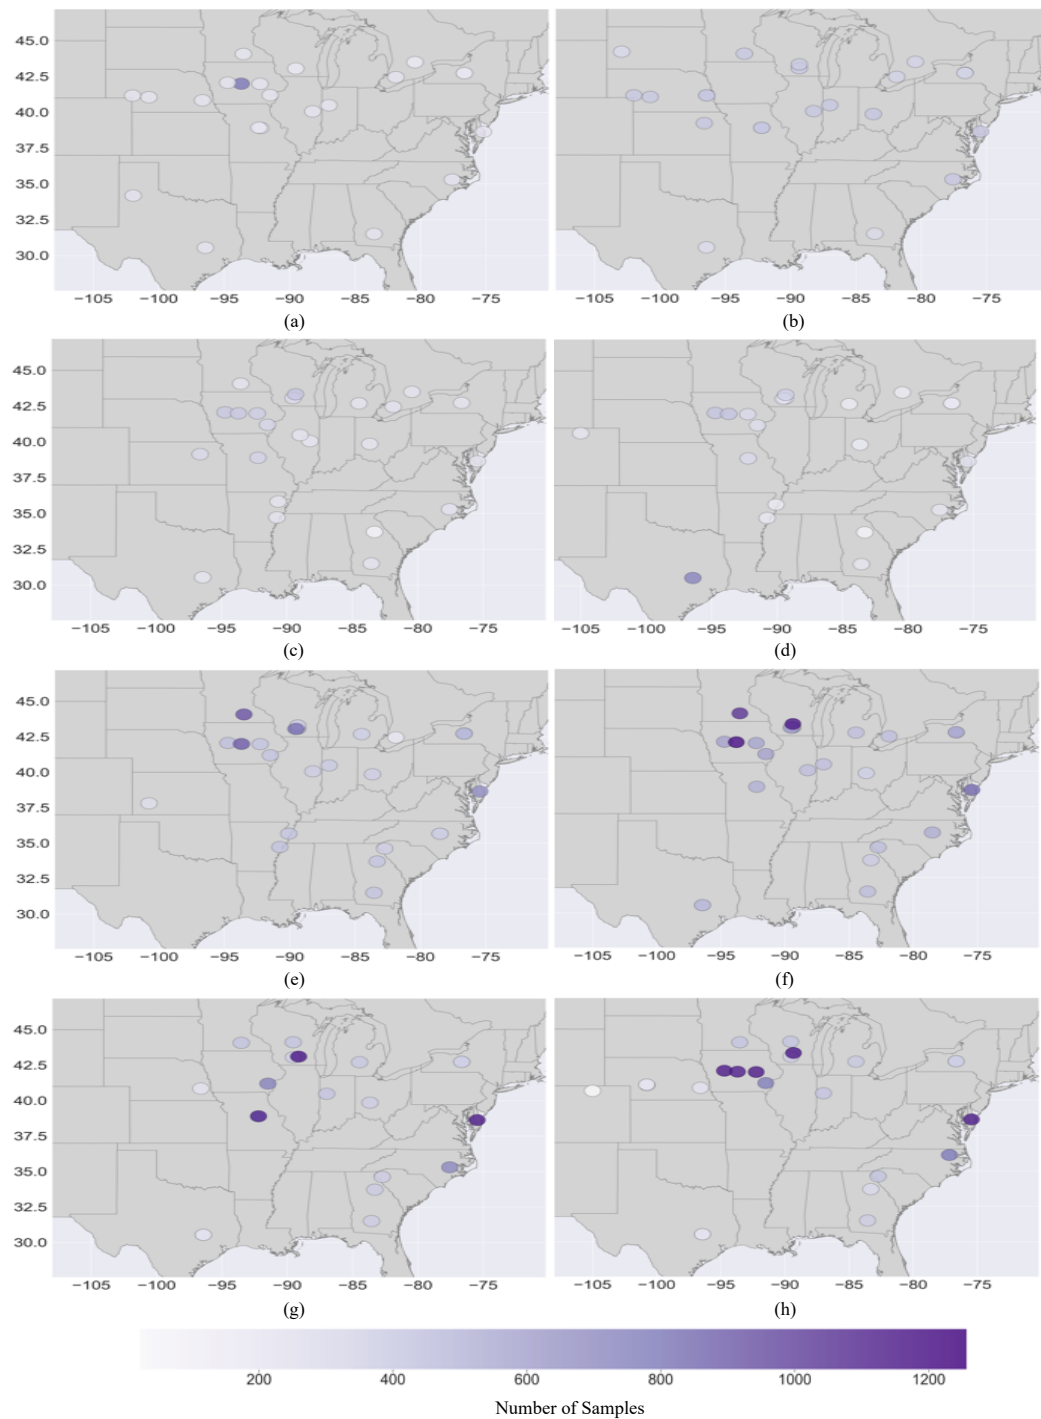

**Supplementary Figure 2. The spatial distribution of phenotypic records in G2F-P database in (a) 2014 to (h) 2021.**
